# Supplementary material
Source: PubMed Central journal article supplement (PMC8632795)
Supplement: mmc2.pdf [file mmc2.pdf]

## Supporting Information

For

### Carboxylic Submetabolome-Driven Signature Characterization of COVID-19 Asymptomatic Infection

Jing Xu,<sup>a,†</sup> Yu Yuan,<sup>b,†</sup> Yao-Yu Chen,<sup>a</sup> Cai-Feng Xiong,<sup>a</sup> Zheng Zhang,<sup>\*c</sup> Yu-Qi

Feng <sup>\*a, d</sup>

a. Department of Chemistry, Wuhan University, Wuhan 430072, P.R. China.

b. Hubei Key Lab of Environment and Health Incubating, Department of Occupation and Environmental Health, Huazhong University of Science & Technology, Wuhan 430030, P.R. China.

c. School of Life Sciences, Central China Normal University, 152 Luoyu Rd, Wuhan 430079, P.R. China.

d. School of Health Sciences, Wuhan University, Wuhan 430071, P.R. China.

† These authors contributed equally to this work.

\*To whom correspondence should be addressed. Tel.: +86-27-68755595; fax: +86-27-68755595. E-mail address: yqfeng@whu.edu.cn, zhangzheng\_whu@126.com.

## Table of contents

1. Chemicals and reagents
2. Carboxylic metabolite identification
3. Baseline characteristics of participants (Table S1)
4. Clinical data of the COVID-19 asymptomatic patients and healthy control (Table S2)
5. ID of the carboxylic features screened by CIL-LC-MS strategy (Table S3)
6. The qualitative results of features in asymptomatic and healthy serum with CIL-LC-MS strategy (Table S4)
7. The identification and statistical analysis result of the discriminative features (Table S5)
8. The Comparison on the sensitivity of regular untargeted method and CIL-LC-MS method (Figure S1)
9. Frequency histogram of RSDs for metabolites in serum that detected by regular untargeted method (Figure S2)
10. The validation for the OPLS-DA models (Figure S3)
11. Boxplot of 21 discriminative features between healthy control and asymptomatic patient group (Figure S4)
12. Chromatogram and MS<sup>n</sup> spectra of metabolites with level 1 identification (Figure S5-9)
13. MS<sup>n</sup> spectra and fragmentation pattern of metabolites with level 2 identification (Figure S10-12)

## Chemicals and reagents

9-decenoic acid, undecenoic acid, 3-hydroxydecanoic acid, 12-hydroxy-5,8,10,14-eicosatetraenoic acid (12-HETE), cholic acid, glyoursodeoxycholic acid (GUDCA) was purchased from J&K Chemical (Beijing, China). Analytical grade ethyl acetate (EA), hydrochloric acid (HCl), formic acid (FA), 2-chloro-1-methylpyridinium iodide (CMPI), triethylamine (TEA), HPLC-grade acetonitrile (ACN), were obtained from Tedia Co. (Fairfield, OH, USA). 2-dimethylaminoethylamine (DMED) was supplied by Sinopharm Chemical Reagent Co., Ltd (Shanghai, China). The isotope labeling reagent of *d*<sub>4</sub>-DMED was synthesized according to our previous work<sup>28</sup>. Ultrapure water was purified by a Milli-Q apparatus (Millipore, Bedford, MA).

## Carboxylic metabolite identification

Thermo Sieve 2.2.0 was used to extract MS spectral peaks of raw data for information about detected carboxylic features, such as accurate *m/z*, peak intensity, and RT. RTs were calibrated by retention index (RI) according to our previously reported method (Zheng SJ et al., *Anal. Chem.* 2018, 90, 8412-8420). An in house Matlab-based software was used to extract the peak pairs with 4.025 Da mass difference, identical RI (Deviation is less than 1%), and 0.5-2 peak intensity ratio. Based on the accurate *m/z*, prospective molecular formulas of DMED-labeled carboxylic features were generated by Thermo Xcalibur 4.2.47 software. A mass tolerance of 10.0 ppm was set, and elements of C, H, N and O were used. Then, an in-house chemically labeled metabolite database (CLMD) (<http://www.clmdb.com>) and several standards were employed for the identification of detected carboxylic features. The acquired formulas not included in CLMD were further searched in HMDB (<https://hmdb.ca>) or METLIN (<https://metlin.scripps.edu/>) for identification.

**Table S1.** Baseline characteristics of participants.

| Variables              | Healthy Control (N=122) | COVID-19 (N=62)     |
|------------------------|-------------------------|---------------------|
| <b>Sex-no. (%)</b>     |                         |                     |
| Male                   | 62 (50.8)               | 30 (48.4)           |
| Female                 | 60 (49.2)               | 32 (52.6)           |
| <b>Age (years)</b>     |                         |                     |
| Mean±SD.               | 44.0 ± 13.5             | 45.0 ± 13.9         |
| Median (IQR)           | 43.0 (35.0-52.0)        | 42.0 ± (36.0 -53.8) |
| Range                  | 19.0-84.0               | 19.0-88.0           |
| <b>IgM (g/L)</b>       |                         |                     |
| Mean±SD.               | 0.32 ± 0.10             | 0.68 ± 1.11         |
| Median (IQR)           | 0.28 (0.26-0.33)        | 0.38 (0.33-0.52)    |
| Range                  | 0.25-0.66               | 0.28-8.7            |
| Seropositive ratio (%) | 0 (0/122)               | 11.3 (7/62)         |
| <b>IgG (g/L)</b>       |                         |                     |
| Mean±SD.               | 0.15 ± 0.04             | 12.43 ± 12.49       |
| Median (IQR)           | 0.14 (0.12-0.18)        | 7.95 (2.95-18.40)   |
| Range                  | 0.1-0.27                | 0.13-54.0           |
| Seropositive ratio (%) | 0 (0/122)               | 90.3 (56/62)        |

\*no. (%), number (percentage); SD, standard deviation; IQR, interquartile range.

**Table S2.** Clinical data of the COVID-19 asymptomatic patients and healthy control.

| Test ID | Sex    | Age | IgG (g/L) | IgM (g/L) | Nucleic Acid Dection |
|---------|--------|-----|-----------|-----------|----------------------|
| 1       | Male   | 74  |           |           | Negative             |
| 2       | Male   | 73  | 13.95     | 1.04      | Positive             |
| 3       | Male   | 74  |           |           | Negative             |
| 4       | Male   | 34  | 0.13      | 0.27      | Negative             |
| 5       | Male   | 34  |           |           | Negative             |
| 6       | Male   | 34  | 2.80      | 0.33      | Positive             |
| 7       | Female | 54  |           |           | Negative             |
| 8       | Female | 54  | 1.89      | 0.31      | Positive             |
| 9       | Female | 52  |           |           | Negative             |
| 10      | Female | 57  |           |           | Negative             |
| 11      | Female | 62  |           |           | Negative             |
| 12      | Female | 62  | 22.19     | 0.77      | Positive             |
| 13      | Male   | 31  |           |           | Negative             |
| 14      | Male   | 31  | 0.22      | 0.34      | Negative             |
| 15      | Male   | 31  | 32.32     | 0.41      | Positive             |
| 16      | Female | 36  | 7.34      | 0.29      | Positive             |
| 17      | Female | 35  |           |           | Negative             |
| 18      | Female | 35  |           |           | Negative             |
| 19      | Male   | 35  |           |           | Negative             |
| 20      | Male   | 37  | 0.10      | 0.26      | Negative             |
| 21      | Male   | 37  | 5.15      | 1.14      | Positive             |
| 22      | Female | 46  |           |           | Negative             |
| 23      | Female | 46  |           |           | Negative             |
| 24      | Female | 46  | 53.98     | 0.36      | Positive             |
| 25      | Female | 88  | 5.12      | 0.36      | Positive             |
| 26      | Female | 91  |           |           | Negative             |
| 27      | Female | 84  |           |           | Negative             |
| 28      | Female | 54  |           |           | Negative             |
| 29      | Female | 52  |           |           | Negative             |
| 30      | Female | 54  | 34.04     | 0.86      | Positive             |
| 31      | Male   | 52  |           |           | Negative             |
| 32      | Male   | 53  | 19.42     | 0.39      | Positive             |
| 33      | Male   | 54  | 0.13      | 0.27      | Negative             |
| 34      | Male   | 60  |           |           | Negative             |
| 35      | Male   | 60  | 26.37     | 0.43      | Positive             |
| 36      | Male   | 61  |           |           | Negative             |
| 37      | Female | 52  |           |           | Negative             |
| 38      | Female | 52  | 6.17      | 0.30      | Positive             |
| 39      | Female | 52  |           |           | Negative             |
| 40      | Female | 35  |           |           | Negative             |

**Table S2.** Clinical data of the COVID-19 asymptomatic patients and healthy control. (continued)

| Test ID | Sex    | Age | IgG(g/L) | IgM(g/L) | Nucleic Acid Dection |
|---------|--------|-----|----------|----------|----------------------|
| 41      | Female | 35  | 8.95     | 0.30     | Positive             |
| 42      | Female | 35  | 0.18     | 0.28     | Negative             |
| 43      | Female | 41  |          |          | Negative             |
| 44      | Female | 40  | 48.84    | 0.34     | Positive             |
| 45      | Female | 38  |          |          | Negative             |
| 46      | Male   | 19  | 0.13     | 0.27     | Negative             |
| 47      | Male   | 19  | 0.14     | 0.66     | Negative             |
| 48      | Male   | 19  | 0.56     | 0.33     | Positive             |
| 49      | Female | 56  | 0.17     | 0.30     | Negative             |
| 50      | Female | 56  |          |          | Negative             |
| 51      | Female | 58  | 2.65     | 0.38     | Positive             |
| 52      | Male   | 38  | 6.71     | 0.86     | Positive             |
| 53      | Male   | 39  |          |          | Negative             |
| 54      | Male   | 38  | 0.19     | 0.26     | Negative             |
| 55      | Female | 32  | 17.71    | 0.33     | Positive             |
| 56      | Female | 32  |          |          | Negative             |
| 57      | Female | 32  | 0.16     | 0.28     | Negative             |
| 58      | Male   | 62  | 0.14     | 0.26     | Negative             |
| 59      | Male   | 63  |          |          | Negative             |
| 60      | Male   | 64  | 8.43     | 8.70     | Positive             |
| 61      | Male   | 43  | 0.13     | 0.28     | Negative             |
| 62      | Male   | 41  |          |          | Negative             |
| 63      | Male   | 42  | 0.13     | 0.33     | Positive             |
| 64      | Female | 43  |          |          | Negative             |
| 65      | Female | 43  |          |          | Negative             |
| 66      | Female | 42  | 14.43    | 0.34     | Positive             |
| 67      | Female | 25  | 4.55     | 0.33     | Positive             |
| 68      | Female | 25  | 0.13     | 0.28     | Negative             |
| 69      | Female | 25  |          |          | Negative             |
| 72      | Male   | 52  |          |          | Negative             |
| 73      | Male   | 40  | 0.12     | 0.44     | Negative             |
| 74      | Male   | 36  |          |          | Negative             |
| 75      | Male   | 39  | 18.49    | 1.37     | Positive             |
| 76      | Female | 49  |          |          | Negative             |
| 77      | Female | 49  | 8.50     | 0.46     | Positive             |
| 78      | Female | 49  |          |          | Negative             |
| 79      | Female | 63  |          |          | Negative             |
| 80      | Female | 56  |          |          | Negative             |
| 81      | Female | 59  | 39.72    | 0.33     | Positive             |
| 82      | Female | 50  |          |          | Negative             |
| 83      | Female | 50  |          |          | Negative             |

**Table S2.** Clinical data of the COVID-19 asymptomatic patients and healthy control (continued).

| Test ID | Sex    | Age | IgG(g/L) | IgM(g/L) | Nucleic Acid Dection |
|---------|--------|-----|----------|----------|----------------------|
| 84      | Female | 50  | 1.28     | 0.32     | Positive             |
| 85      | Female | 23  |          |          | Negative             |
| 86      | Female | 21  | 0.10     | 0.38     | Negative             |
| 87      | Female | 21  | 10.01    | 0.38     | Positive             |
| 88      | Female | 35  |          |          | Negative             |
| 89      | Female | 36  | 3.67     | 0.42     | Positive             |
| 90      | Female | 35  |          |          | Negative             |
| 91      | Female | 45  |          |          | Negative             |
| 92      | Female | 45  |          |          | Negative             |
| 93      | Female | 45  | 9.87     | 0.34     | Positive             |
| 94      | Male   | 40  |          |          | Negative             |
| 95      | Male   | 42  | 0.13     | 0.28     | Positive             |
| 96      | Male   | 43  | 0.25     | 0.26     | Negative             |
| 97      | Female | 43  |          |          | Negative             |
| 98      | Female | 42  | 2.11     | 0.34     | Positive             |
| 99      | Female | 42  |          |          | Negative             |
| 100     | Male   | 47  |          |          | Negative             |
| 101     | Male   | 51  |          |          | Negative             |
| 103     | Female | 69  |          |          | Negative             |
| 105     | Female | 68  | 7.93     | 0.35     | Positive             |
| 106     | Male   | 49  | 2.31     | 0.47     | Positive             |
| 107     | Male   | 46  | 0.10     | 0.26     | Negative             |
| 108     | Male   | 48  |          |          | Negative             |
| 109     | Female | 43  | 0.10     | 0.31     | Negative             |
| 111     | Female | 41  | 13.89    | 0.35     | Positive             |
| 112     | Male   | 38  | 28.15    | 0.42     | Positive             |
| 113     | Male   | 38  |          |          | Negative             |
| 114     | Male   | 37  | 0.16     | 0.26     | Negative             |
| 115     | Female | 35  |          |          | Negative             |
| 116     | Female | 35  |          |          | Negative             |
| 117     | Female | 36  | 3.33     | 0.31     | Positive             |
| 118     | Female | 38  | 0.17     | 0.30     | Positive             |
| 119     | Female | 34  |          |          | Negative             |
| 120     | Female | 38  |          |          | Negative             |
| 121     | Male   | 35  | 0.18     | 0.28     | Negative             |
| 122     | Male   | 35  |          |          | Negative             |
| 124     | Male   | 42  | 0.20     | 0.26     | Negative             |
| 125     | Male   | 42  | 12.04    | 0.53     | Positive             |
| 126     | Male   | 41  |          |          | Negative             |
| 127     | Male   | 57  | 0.16     | 0.28     | Negative             |
| 128     | Male   | 55  | 3.89     | 0.45     | Positive             |
| 129     | Male   | 52  |          |          | Negative             |
| 130     | Male   | 30  |          |          | Negative             |

**Table S2.** Clinical data of the COVID-19 asymptomatic patients and healthy control (continued).

| Test ID | Sex    | Age | IgG(g/L) | IgM(g/L) | Nucleic Acid Detection |
|---------|--------|-----|----------|----------|------------------------|
| 131     | Male   | 30  | 0.11     | 0.26     | Negative               |
| 132     | Male   | 30  | 18.13    | 1.98     | Positive               |
| 133     | Male   | 34  | 0.10     | 0.38     | Negative               |
| 134     | Male   | 34  | 22.75    | 0.37     | Positive               |
| 135     | Male   | 34  |          |          | Negative               |
| 136     | Male   | 23  | 7.97     | 0.34     | Positive               |
| 137     | Male   | 28  |          |          | Negative               |
| 138     | Male   | 23  | 0.11     | 0.66     | Negative               |
| 139     | Male   | 51  |          |          | Negative               |
| 141     | Male   | 51  | 0.21     | 0.50     | Negative               |
| 142     | Male   | 44  | 0.19     | 0.37     | Negative               |
| 143     | Male   | 45  | 25.13    | 0.46     | Positive               |
| 144     | Male   | 45  |          |          | Negative               |
| 145     | Male   | 39  |          |          | Negative               |
| 147     | Male   | 39  | 10.90    | 1.04     | Positive               |
| 148     | Male   | 63  |          |          | Negative               |
| 149     | Male   | 64  | 34.68    | 1.11     | Positive               |
| 150     | Male   | 66  |          |          | Negative               |
| 151     | Female | 32  | 4.29     | 0.30     | Positive               |
| 152     | Female | 32  |          |          | Negative               |
| 154     | Female | 38  | 4.81     | 0.32     | Positive               |
| 155     | Female | 38  |          |          | Negative               |
| 158     | Male   | 56  | 0.21     | 0.28     | Negative               |
| 161     | Female | 37  |          |          | Negative               |
| 162     | Female | 37  | 11.66    | 0.32     | Positive               |
| 163     | Male   | 28  |          |          | Negative               |
| 164     | Male   | 28  | 0.27     | 0.28     | Negative               |
| 165     | Male   | 28  | 1.63     | 0.38     | Positive               |
| 167     | Male   | 21  | 0.18     | 0.33     | Negative               |
| 168     | Male   | 21  | 0.12     | 0.25     | Negative               |
| 169     | Female | 48  | 30.16    | 2.75     | Positive               |
| 170     | Female | 48  |          |          | Negative               |
| 173     | Female | 52  |          |          | Negative               |
| 175     | Female | 48  |          |          | Negative               |
| 177     | Female | 48  |          |          | Negative               |
| 178     | Male   | 35  |          |          | Negative               |
| 183     | Male   | 42  | 0.14     | 0.25     | Negative               |
| 184     | Male   | 49  | 0.13     | 0.30     | Positive               |
| 185     | Male   | 49  |          |          | Negative               |
| 186     | Male   | 46  |          |          | Negative               |
| 195     | Female | 40  | 18.08    | 0.43     | Positive               |
| 197     | Female | 47  |          |          | Negative               |



**Table S2.** Clinical data of the COVID-19 asymptomatic patients and healthy control (continued).

| Test ID | Sex    | Age | IgG(g/L) | IgM(g/L) | Nucleic Acid Detection |
|---------|--------|-----|----------|----------|------------------------|
| 203     | Male   | 22  | 6.26     | 0.77     | Positive               |
| 216     | Male   | 66  | 27.58    | 0.36     | Positive               |
| 233     | Female | 27  |          |          | Negative               |
| 239     | Male   | 61  | 1.19     | 0.30     | Positive               |
| 246     | Female | 43  | 2.86     | 0.30     | Positive               |
| 249     | Female | 30  |          |          | Negative               |
| 250     | Male   | 72  |          |          | Negative               |
| 252     | Male   | 71  | 23.17    | 1.01     | Positive               |
| 253     | Male   | 40  | 4.13     | 1.25     | Positive               |
| 259     | Male   | 40  |          |          | Negative               |
| 264     | Male   | 51  |          |          | Negative               |
| 265     | Female | 61  |          |          | Negative               |
| 267     | Female | 62  | 0.17     | 0.67     | Positive               |
| 269     | Male   | 37  | 2.60     | 0.38     | Positive               |
| 272     | Female | 33  | 3.23     | 0.49     | Positive               |
| 273     | Female | 33  | 0.15     | 0.27     | Negative               |
| 274     | Female | 55  |          |          | Negative               |
| 275     | Female | 64  |          |          | Negative               |

**Table S3.** ID of the carboxylic features screened by CIL-LC-MS strategy

| ID | <i>m/z</i> | RI   | Primary ID | <i>m/z</i> | RI   |
|----|------------|------|------------|------------|------|
| 1  | 221.1652   | 695  | 49         | 315.2644   | 1172 |
| 2  | 227.2120   | 765  | 50         | 318.1817   | 755  |
| 3  | 231.2070   | 678  | 51         | 321.2539   | 977  |
| 4  | 235.1807   | 792  | 52         | 328.2961   | 1178 |
| 5  | 235.1809   | 869  | 53         | 328.2962   | 875  |
| 6  | 236.1252   | 678  | 54         | 330.2390   | 700  |
| 7  | 237.1963   | 817  | 55         | 336.2285   | 667  |
| 8  | 237.1963   | 831  | 56         | 336.3013   | 988  |
| 9  | 237.1963   | 845  | 57         | 336.3013   | 1005 |
| 10 | 239.2122   | 814  | 58         | 337.2486   | 1085 |
| 11 | 241.2276   | 900  | 59         | 341.3529   | 1700 |
| 12 | 241.2276   | 923  | 60         | 343.2956   | 1372 |
| 13 | 243.2434   | 1000 | 61         | 351.3009   | 1082 |
| 14 | 246.1605   | 601  | 62         | 355.3681   | 1800 |
| 15 | 249.2326   | 1121 | 63         | 356.3271   | 1367 |
| 16 | 255.2070   | 716  | 64         | 358.2703   | 804  |
| 17 | 255.2432   | 997  | 65         | 366.2752   | 979  |
| 18 | 257.2589   | 1100 | 66         | 367.2593   | 1145 |
| 19 | 259.2017   | 779  | 67         | 371.3057   | 1249 |
| 20 | 259.2383   | 926  | 68         | 372.2859   | 862  |
| 21 | 259.2384   | 864  | 69         | 382.2702   | 779  |
| 22 | 260.1760   | 657  | 70         | 382.3068   | 1308 |
| 23 | 265.2277   | 934  | 71         | 383.3269   | 1118 |
| 24 | 269.2590   | 1068 | 72         | 383.3272   | 982  |
| 25 | 269.2590   | 1094 | 73         | 385.2233   | 784  |
| 26 | 271.2380   | 984  | 74         | 385.285    | 1091 |
| 27 | 271.2744   | 1200 | 75         | 386.3014   | 919  |
| 28 | 273.2176   | 746  | 76         | 389.2187   | 718  |
| 29 | 276.2106   | 968  | 77         | 389.2187   | 748  |
| 30 | 285.2904   | 1300 | 78         | 391.3323   | 1276 |
| 31 | 286.2493   | 704  | 79         | 394.3065   | 1153 |
| 32 | 289.2639   | 1327 | 80         | 409.4156   | 2022 |
| 33 | 295.2744   | 1199 | 81         | 423.3582   | 1683 |
| 34 | 296.2696   | 946  | 82         | 440.1773   | 865  |
| 35 | 297.2901   | 1274 | 83         | 441.4054   | 2028 |
| 36 | 297.2901   | 1291 | 84         | 463.3896   | 1079 |
| 37 | 299.2330   | 998  | 85         | 463.3898   | 910  |
| 38 | 299.3058   | 1400 | 86         | 463.3898   | 964  |
| 39 | 300.2652   | 763  | 87         | 463.3899   | 1106 |
| 40 | 301.2489   | 1069 | 88         | 463.3901   | 980  |
| 41 | 307.2746   | 822  | 89         | 471.3585   | 1674 |
| 42 | 309.2174   | 939  | 90         | 479.3481   | 922  |
| 43 | 309.2174   | 954  | 91         | 479.3849   | 987  |
| 44 | 309.2174   | 970  | 92         | 487.4261   | 1310 |
| 45 | 311.2334   | 847  | 93         | 503.4208   | 1122 |
| 46 | 311.3059   | 1392 | 94         | 520.4110   | 1091 |
| 47 | 313.2488   | 1082 | 95         | 520.4111   | 958  |
| 48 | 313.3215   | 1500 | 96         | 541.4689   | 1066 |

**Table S4.** The qualitative results of features in asymptomatic and healthy serum with CIL-LC-MS strategy (Please see the .xlsx file named “Table S4-Quantitative analysis”)

**Table S5.** The identification and statistical analysis result of the discriminative features

| ID | DMED labeled $m/z$ | $d_r$ -DMED labeled $m/z$ | DMED labeled RT (min) | RI   | Unlabeled molecular | Name                          | CAS        | Database | MSI | $p$ value | FC (AS/HC) | VIP  | Difference rank |
|----|--------------------|---------------------------|-----------------------|------|---------------------|-------------------------------|------------|----------|-----|-----------|------------|------|-----------------|
| 12 | 241.2276           | 245.2526                  | 15.14                 | 923  | C10H18O2            | 9-Decenoic acid               | 14436-32-9 | CLMD     | 1   | 3.13E-06  | 0.75       | 1.58 | 1               |
| 17 | 255.2432           | 259.2682                  | 16.63                 | 997  | C11H20O2            | Undecylenic acid              | 112-38-9   | CLMD     | 1   | 1.05E-11  | 0.43       | 2.16 | 1               |
| 21 | 259.2384           | 263.2634                  | 13.84                 | 864  | C10H20O3            | 3-Hydroxydecanoic acid        | 14292-26-3 | CLMD     | 1   | 2.53E-06  | 0.60       | 1.63 | 1               |
| 78 | 391.3323           | 395.3573                  | 21.23                 | 1276 | C20H32O3            | 12(R)-HETE                    | 82337-46-0 | CLMD     | 1   | 7.10E-11  | 0.43       | 2.24 | 1               |
| 91 | 479.3849           | 483.4099                  | 16.43                 | 987  | C24H40O5            | Cholic acid                   | 81-25-4    | CLMD     | 1   | 3.71E-03  | 1.80       | 0.96 | 2               |
| 95 | 520.4111           | 524.4361                  | 15.85                 | 958  | C26H43O5N           | GUDCA                         | 64480-66-6 | HMDB     | 1   | 8.29E-05  | 1.97       | 1.27 | 1               |
| 19 | 259.2017           | 263.2267                  | 11.62                 | 779  | C9H16O4             | 3-(Hexanoyloxy)propanoic acid |            |          | 2   | 7.00E-03  | 1.47       | 1.18 | 1               |
| 37 | 299.2330           | 303.2580                  | 16.65                 | 998  | C12H20O4            | 3-(2-Enoyloxy)propanoic acid  |            |          | 2   | 1.39E-02  | 1.33       | 1.16 | 1               |
| 72 | 383.3272           | 387.3522                  | 16.34                 | 982  | C18H32O4            | 15,16-DiHODE                  |            | HMDB     | 2   | 6.71E-07  | 2.41       | 1.86 | 1               |
| 3  | 231.2070           | 235.2320                  | 7.80                  | 678  | C8H16O3             | 3-Hydroxyvalproic acid        | 58888-84-9 | Metlin   | 3   | 5.32E-04  | 0.83       | 1.10 | 1               |
|    |                    |                           |                       |      |                     | 4-Hydroxyvalproic acid        | 60113-82-8 | Metlin   |     |           |            |      |                 |
|    |                    |                           |                       |      |                     | 5-Hydroxyvalproic acid        | 53660-23-4 | Metlin   |     |           |            |      |                 |
|    |                    |                           |                       |      |                     | 2-hydroxy caprylic acid       | 617-73-2   | Metlin   |     |           |            |      |                 |
|    |                    |                           |                       |      |                     | 3-hydroxy caprylic acid       | 33796-86-0 | Metlin   |     |           |            |      |                 |
|    |                    |                           |                       |      |                     | 6-hydroxy caprylic acid       | 64165-18-0 | Metlin   |     |           |            |      |                 |
|    |                    |                           |                       |      |                     | 8-hydroxy caprylic acid       | 764-89-6   | Metlin   |     |           |            |      |                 |
|    |                    |                           |                       |      |                     | 3-hydroxy-isoheptanoic acid   |            | Metlin   |     |           |            |      |                 |
|    |                    |                           |                       |      |                     | 2-hydroxy-octanoic acid       | 617-73-2   | Metlin   |     |           |            |      |                 |
|    |                    |                           |                       |      |                     | 3-hydroxy-octanoic acid       | 33796-86-0 | Metlin   |     |           |            |      |                 |
|    |                    |                           |                       |      |                     | 4-hydroxy-octanoic acid       | 7779-55-7  | Metlin   |     |           |            |      |                 |
|    |                    |                           |                       |      |                     | 5-hydroxy-octanoic acid       | 17369-50-5 | Metlin   |     |           |            |      |                 |
|    |                    |                           |                       |      |                     | 7-hydroxy-octanoic acid       | 17173-14-7 | Metlin   |     |           |            |      |                 |
|    |                    |                           |                       |      |                     | 4-Butoxybutanoic acid         | 55724-73-7 | Metlin   |     |           |            |      |                 |
| 4  | 235.1807           | 239.2057                  | 12.05                 | 792  | C10H12O2            | Benzenebutanoic acid          | 1821-12-1  | CLMD     | 3   | 1.47E-02  | 1.12       | 1.02 | 3               |
|    |                    |                           |                       |      |                     | 2,4-Decadienoic acid          |            | Metlin   |     |           |            |      |                 |
|    |                    |                           |                       |      |                     | 4-Isopropylbenzoic acid       | 536-66-3   | Metlin   |     |           |            |      |                 |
|    |                    |                           |                       |      |                     | 3-Phenylbutyric acid          | 4593-90-2  | Metlin   |     |           |            |      |                 |
|    |                    |                           |                       |      |                     | 2-Phenylbutyric acid          | 90-27-7    | Metlin   |     |           |            |      |                 |
|    |                    |                           |                       |      |                     | 4-Phenylbutyric acid          | 1821-12-1  | Metlin   |     |           |            |      |                 |
| 5  | 235.1809           | 239.2059                  | 13.93                 | 869  | C10H12O2            | 2-(4-Ethylphenyl)acetic acid  | 14387-10-1 | Metlin   | 3   | 1.30E-03  | 0.78       | 1.15 | 1               |
| 7  | 237.1963           | 241.2213                  | 12.70                 | 817  | C10H14O2            | Perillic acid                 | 7694-45-3  | Metlin   | 3   | 5.01E-02  | 1.23       | 1.14 | 3               |
|    |                    |                           |                       |      |                     | 2,6,8-Decatrienoic acid       | 94450-21-2 | Metlin   |     |           |            |      |                 |
|    |                    |                           |                       |      |                     | Myrtenic acid                 | 19250-17-0 | Metlin   |     |           |            |      |                 |
| 8  | 237.1963           | 241.2213                  | 13.03                 | 831  | C10H14O2            | Perillic acid                 | 7694-45-3  | Metlin   | 3   | 1.24E-03  | 1.36       | 1.30 | 1               |
|    |                    |                           |                       |      |                     | 2,6,8-Decatrienoic acid       | 94450-21-2 | Metlin   |     |           |            |      |                 |
|    |                    |                           |                       |      |                     | Myrtenic acid                 | 19250-17-0 | Metlin   |     |           |            |      |                 |
| 10 | 239.2122           | 243.2372                  | 12.62                 | 814  | C10H16O2            | cis, cis-stillingic acid      |            | Metlin   | 3   | 3.60E-02  | 1.03       | 1.05 | 3               |
|    |                    |                           |                       |      |                     | 2,4-decadienoic acid          | 63889-75-8 | Metlin   |     |           |            |      |                 |
|    |                    |                           |                       |      |                     | trans, cis-stillingic acid    |            | Metlin   |     |           |            |      |                 |
|    |                    |                           |                       |      |                     | 2,6-decadienoic acid          |            | Metlin   |     |           |            |      |                 |
|    |                    |                           |                       |      |                     | 4E,6E-decadienoic acid        | 60388-65-0 | Metlin   |     |           |            |      |                 |

**Table S5.** The identification and statistical analysis result of the discriminative features (continued)

| ID | DMED labeled $m/z$ | $d_4$ -DMED labeled $m/z$ | DMED labeled RT (min) | RI   | Unlabeled molecular | Name                                                                                                                                                                                                                                                                  | CAS                                                  | Database                                                                                         | MSI | $p$ value | FC (AS/HC) | VIP  | Difference rank |
|----|--------------------|---------------------------|-----------------------|------|---------------------|-----------------------------------------------------------------------------------------------------------------------------------------------------------------------------------------------------------------------------------------------------------------------|------------------------------------------------------|--------------------------------------------------------------------------------------------------|-----|-----------|------------|------|-----------------|
| 10 | 239.2122           | 243.2372                  | 12.62                 | 814  | C10H16O2            | Aleprestic acid<br>2,5-decadienoic acid<br>2E,7Z-decadienoic acid<br>3,5-decadienoic acid<br>4,8-decadienoic acid<br>4E,9-decadienoic acid<br>5E,9-decadienoic acid<br>5E,8E-decadienoic acid<br>6E,8E-decadienoic acid<br>7,9-decadienoic acid<br>Chrysanthemic acid |                                                      | Metlin<br>Metlin<br>Metlin<br>Metlin<br>Metlin<br>Metlin<br>Metlin<br>Metlin<br>Metlin<br>Metlin | 3   | 3.60E-02  | 1.03       | 1.05 | 3               |
| 13 | 243.2434           | 247.2684                  | 16.70                 | 1000 | C10H20O2            | Capric acid<br>2-methyl nonanoic acid<br>8-methyl Nonanoic acid<br>3-methyl-nonanoic acid<br>7-methyl-nonanoic acid<br>8-methyl-nonanoic acid<br>4-Methylnonanoic acid<br>4-Ethyl octanoic acid                                                                       | 334-48-5<br>45019-28-1<br>16493-80-4                 | Metlin<br>Metlin<br>Metlin<br>Metlin<br>Metlin<br>Metlin<br>Metlin                               | 3   | 1.56E-02  | 1.19       | 1.14 | 3               |
| 16 | 255.2070           | 259.2320                  | 9.60                  | 716  | C10H16O3            | (3R)-3-isopropenyl-6-oxoheptanoic acid<br>(3S)-3-isopropenyl-6-oxoheptanoic acid<br>9-oxo-2E-decenoic acid<br>9-oxo-2Z-decenoic acid<br>5-oxo-7E-decenoic acid<br>(1R)-Nepetalic acid<br>(S)-Oleuropeic acid<br>(E)-10-Oxo-8-decenoic acid<br>Nepetalic acid          | 21651-54-7<br>5027-76-9<br>69152-89-2                | Metlin<br>Metlin<br>Metlin<br>Metlin<br>Metlin<br>Metlin<br>Metlin                               | 3   | 6.77E-02  | 0.77       | 1.03 | 3               |
| 24 | 269.2590           | 273.2840                  | 17.89                 | 1068 | C12H22O2            | 5-methyl-2-undecenoic acid<br>2-lauroleic acid<br>Linderic acid<br>6-lauroleic acid<br>7-lauroleic acid<br>9-lauroleic acid<br>10-Lauroleic acid<br>11-lauroleic acid<br>5-dodecenoic acid                                                                            | 2430-94-6                                            | Metlin<br>Metlin<br>Metlin<br>Metlin<br>Metlin<br>Metlin<br>Metlin<br>Metlin                     | 3   | 7.94E-07  | 0.39       | 1.55 | 1               |
| 33 | 295.2744           | 299.2994                  | 19.99                 | 1199 | C14H24O2            | 13-Tetradecynoic acid<br>9-Tetradecynoic acid<br>8-Tetradecynoic acid<br>7-Tetradecynoic acid                                                                                                                                                                         | 82909-47-5<br>55182-92-8<br>55182-90-6<br>55182-86-0 | Metlin<br>Metlin<br>Metlin<br>Metlin                                                             | 3   | 2.30E-11  | 0.31       | 2.18 | 1               |

**Table S5.** The identification and statistical analysis result of the discriminative features (continued)

| ID | DMED labeled $m/z$ | $d_r$ -DMED labeled $m/z$ | DMED labeled RT (min) | RI   | Unlabeled molecular | Name                                                                                                                                                                                                                                                                                                                                                                                                                        | CAS                                                                                                                                    | Database                                                                                                                                                     | MSI | $p$ value | FC (AS/HC) | VIP  | Difference rank |
|----|--------------------|---------------------------|-----------------------|------|---------------------|-----------------------------------------------------------------------------------------------------------------------------------------------------------------------------------------------------------------------------------------------------------------------------------------------------------------------------------------------------------------------------------------------------------------------------|----------------------------------------------------------------------------------------------------------------------------------------|--------------------------------------------------------------------------------------------------------------------------------------------------------------|-----|-----------|------------|------|-----------------|
| 33 | 295.2744           | 299.2994                  | 19.99                 | 1199 | C14H24O2            | 3-Tetradecynoic acid<br>5Z,8Z-tetradecadienoic acid<br>2E,4E-tetradecadienoic acid<br>Alepric acid<br>3Z,5Z-tetradecadienoic acid<br>3Z,5E-tetradecadienoic acid<br>3,4-tetradecadienoic acid<br>5,8-tetradecadienoic acid<br>10Z,12E-tetradecadienoic acid<br>4-Tetradecynoic acid<br>5-Tetradecynoic acid<br>6-Tetradecynoic acid<br>10-Tetradecynoic acid<br>11-Tetradecynoic acid<br>12-Tetradecynoic acid<br>14:2(6,9) | 55182-76-8<br>39039-37-7<br>29826-00-4;<br>2519-24-6<br>25091-12-7<br>23400-52-4<br>112146-20-0<br>10390-16-6                          | Metlin<br>Metlin<br>Metlin<br>Metlin<br>Metlin<br>Metlin<br>Metlin<br>Metlin<br>Metlin<br>Metlin<br>Metlin<br>Metlin<br>Metlin<br>Metlin<br>Metlin<br>Metlin | 3   | 2.30E-11  | 0.31       | 2.18 | 1               |
| 40 | 301.2489           | 305.2739                  | 17.92                 | 1069 | C12H22O4            | Dodecanedioic acid                                                                                                                                                                                                                                                                                                                                                                                                          | 693-23-2                                                                                                                               | Metlin<br>Metlin                                                                                                                                             | 3   | 8.78E-02  | 1.26       | 1.12 | 3               |
| 42 | 309.2174           | 313.2424                  | 15.48                 | 939  | C13H18O4            | Octanedioic acid, 2,2,7,7-tetramethyl-3-(1-hydroxy-4-phenylbutoxy)propanoic acid                                                                                                                                                                                                                                                                                                                                            |                                                                                                                                        | Metlin                                                                                                                                                       | 3   | 7.71E-02  | 1.25       | 1.14 | 3               |
| 43 | 309.2174           | 313.2424                  | 15.78                 | 954  | C13H18O4            | 3-(1-hydroxy-4-phenylbutoxy)propanoic acid                                                                                                                                                                                                                                                                                                                                                                                  |                                                                                                                                        | Metlin                                                                                                                                                       | 3   | 1.34E-01  | 1.18       | 1.11 | 3               |
| 44 | 309.2174           | 313.2424                  | 16.09                 | 970  | C13H18O4            | 3-(1-hydroxy-4-phenylbutoxy)propanoic acid                                                                                                                                                                                                                                                                                                                                                                                  |                                                                                                                                        | Metlin                                                                                                                                                       | 3   | 1.45E-02  | 1.36       | 1.22 | 1               |
| 47 | 313.2488           | 317.2738                  | 18.16                 | 1082 | C13H22O4            | 7-(2-Formyl-5-hydroxycyclopentyl)heptanoic acid<br>2,7-Diethyl-4-methyloct-4-enedioic acid<br>2-(Non-1-en-1-yl)butanedioic acid<br>2-Carboxy-4-dodecanolide                                                                                                                                                                                                                                                                 | 55502-82-4<br>55005-88-4<br>28299-28-7                                                                                                 | Metlin<br>Metlin<br>Metlin<br>Metlin                                                                                                                         | 3   | 2.37E-02  | 0.36       | 1.15 | 1               |
| 49 | 315.2644           | 319.2894                  | 19.58                 | 1172 | C13H24O4            | Isooctyl hydrogen glutarate<br>2,4-Dibutylpentanedioic acid<br>6,6-Dimethylundecanedioic acid<br>3-(2,4-Dimethylpentan-2-yl)hexanedioic acid<br>2-Octylpentanedioic acid<br>8-(Tetrahydro-2H-pyran-2-yloxy)octanoic acid<br>2-(Decanoyloxy)propanoic acid<br>Decylmalonic acid<br>Dodecanedioic acid monomethyl ester<br>Nonanedioic acid, 2,2,8,8-tetramethyl-2-methyl-dodecanedioic acid                                  | 94248-70-1<br>92155-85-6<br>89131-65-7<br>88438-11-3<br>59039-06-4<br>54699-43-3<br>51119-25-6<br>4372-29-6<br>3903-40-0<br>30313-67-8 | Metlin<br>Metlin<br>Metlin<br>Metlin<br>Metlin<br>Metlin<br>Metlin<br>Metlin<br>Metlin<br>Metlin<br>Metlin                                                   | 3   | 3.94E-02  | 1.32       | 1.07 | 1               |

**Table S5.** The identification and statistical analysis result of the discriminative features (continued)

| ID | DMED labeled $m/z$ | $d_r$ -DMED labeled $m/z$ | DMED labeled RT (min) | RI   | Unlabeled molecular | Name                                                                                                                                                                   | CAS                                                   | Database                             | MSI | $p$ value | FC (AS/HC) | VIP  | Difference rank |
|----|--------------------|---------------------------|-----------------------|------|---------------------|------------------------------------------------------------------------------------------------------------------------------------------------------------------------|-------------------------------------------------------|--------------------------------------|-----|-----------|------------|------|-----------------|
| 58 | 337.2486           | 341.2736                  | 18.20                 | 1085 | C15H22O4            | 3-methyl-dodecanedioic acid<br>4-methyl-dodecanedioic acid<br>6-methyl-dodecanedioic acid<br>Xanthoxic acid                                                            |                                                       | Metlin<br>Metlin<br>Metlin<br>Metlin | 3   | 8.15E-01  | 0.88       | 1.00 | 3               |
| 61 | 351.3009           | 355.3259                  | 18.16                 | 1082 | C17H28O3            | 4'-Dihydroabscisic acid<br>12S-hydroxy-5Z,8E,10E-heptadecatrienoic acid<br>12-hydroxy-5,8,10-heptadecatrienoic acid<br>(13S)-13-Hydroxyheptadeca-9,11,15-trienoic acid | 84026-26-6<br>54397-84-1<br>50683-78-8<br>168781-98-4 | Metlin<br>Metlin                     | 3   | 6.22E-07  | 0.54       | 1.90 | 1               |
| 90 | 479.3481           | 483.3731                  | 15.13                 | 922  | C23H36O6            | (3R,5R)-3,5-Dihydroxy-7-<br>{(1S,2S,8S,8aR)-2-methyl-8-[(2-methylbutanoyl)oxy]-1,2,6,7,8,8a-hexahydro-1-naphthalenyl}heptanoic acid                                    |                                                       | Metlin                               | 3   | 1.95E-04  | 0.40       | 1.31 | 1               |
| 39 | 300.2652           | 304.2902                  | 11.12                 | 763  | C12H23O3N           |                                                                                                                                                                        |                                                       |                                      | 4   | 2.32E-02  | 1.08       | 1.04 | 3               |
| 50 | 318.1817           | 322.2067                  | 10.85                 | 755  | C13H13O4N           |                                                                                                                                                                        |                                                       |                                      | 4   | 1.43E-01  | 1.29       | 1.00 | 3               |
| 53 | 328.2962           | 332.3212                  | 14.09                 | 875  | C14H27O3N           |                                                                                                                                                                        |                                                       |                                      | 4   | 1.98E-02  | 1.11       | 1.19 | 3               |
| 54 | 330.2390           | 334.2640                  | 9.07                  | 700  | C12H21O5N           |                                                                                                                                                                        |                                                       |                                      | 4   | 4.27E-02  | 1.28       | 1.15 | 1               |
| 55 | 336.2285           | 340.2535                  | 7.13                  | 667  | C14H19O4N           |                                                                                                                                                                        |                                                       |                                      | 4   | 7.56E-03  | 0.69       | 0.81 | 2               |
| 64 | 358.2703           | 362.2953                  | 12.38                 | 804  | C14H25O5N           |                                                                                                                                                                        |                                                       |                                      | 4   | 7.12E-02  | 1.24       | 1.14 | 3               |
| 65 | 366.2752           | 370.3002                  | 16.28                 | 979  | C16H25O4N           |                                                                                                                                                                        |                                                       |                                      | 4   | 1.36E-02  | 0.64       | 0.88 | 2               |
| 68 | 372.2859           | 376.3109                  | 13.77                 | 862  | C15H27O5N           |                                                                                                                                                                        |                                                       |                                      | 4   | 5.82E-02  | 1.30       | 1.12 | 3               |
| 69 | 382.2702           | 386.2952                  | 11.61                 | 779  | C16H25O5N           |                                                                                                                                                                        |                                                       |                                      | 4   | 4.26E-02  | 0.81       | 0.75 | 2               |
| 73 | 385.2233           | 389.2483                  | 11.78                 | 784  | C17H18O4N2          |                                                                                                                                                                        |                                                       |                                      | 4   | 1.36E-04  | 0.76       | 1.13 | 1               |
| 75 | 386.3014           | 390.3264                  | 15.07                 | 919  | C16H29O5N           |                                                                                                                                                                        |                                                       |                                      | 4   | 4.12E-02  | 1.29       | 1.18 | 1               |
| 76 | 389.2187           | 393.2437                  | 9.66                  | 718  | C16H18O5N2          |                                                                                                                                                                        |                                                       |                                      | 4   | 1.73E-02  | 0.79       | 0.82 | 2               |
| 77 | 389.2187           | 393.2437                  | 10.62                 | 748  | C16H18O5N2          |                                                                                                                                                                        |                                                       |                                      | 4   | 1.31E-02  | 0.80       | 0.88 | 2               |
| 92 | 487.4261           | 491.4511                  | 21.77                 | 1310 | C22H44O5N2          |                                                                                                                                                                        |                                                       |                                      | 4   | 3.78E-05  | 0.75       | 1.15 | 1               |
| 93 | 503.4208           | 507.4458                  | 18.80                 | 1122 | C22H44O6N2          |                                                                                                                                                                        |                                                       |                                      | 4   | 4.19E-05  | 0.80       | 1.30 | 1               |
| 96 | 541.4689           | 545.4939                  | 17.87                 | 1066 | C26H50O5N2          |                                                                                                                                                                        |                                                       |                                      | 4   | 1.36E-01  | 1.12       | 1.03 | 3               |

\* The 21 significant variables irrelevant to age and gender were marked as red.

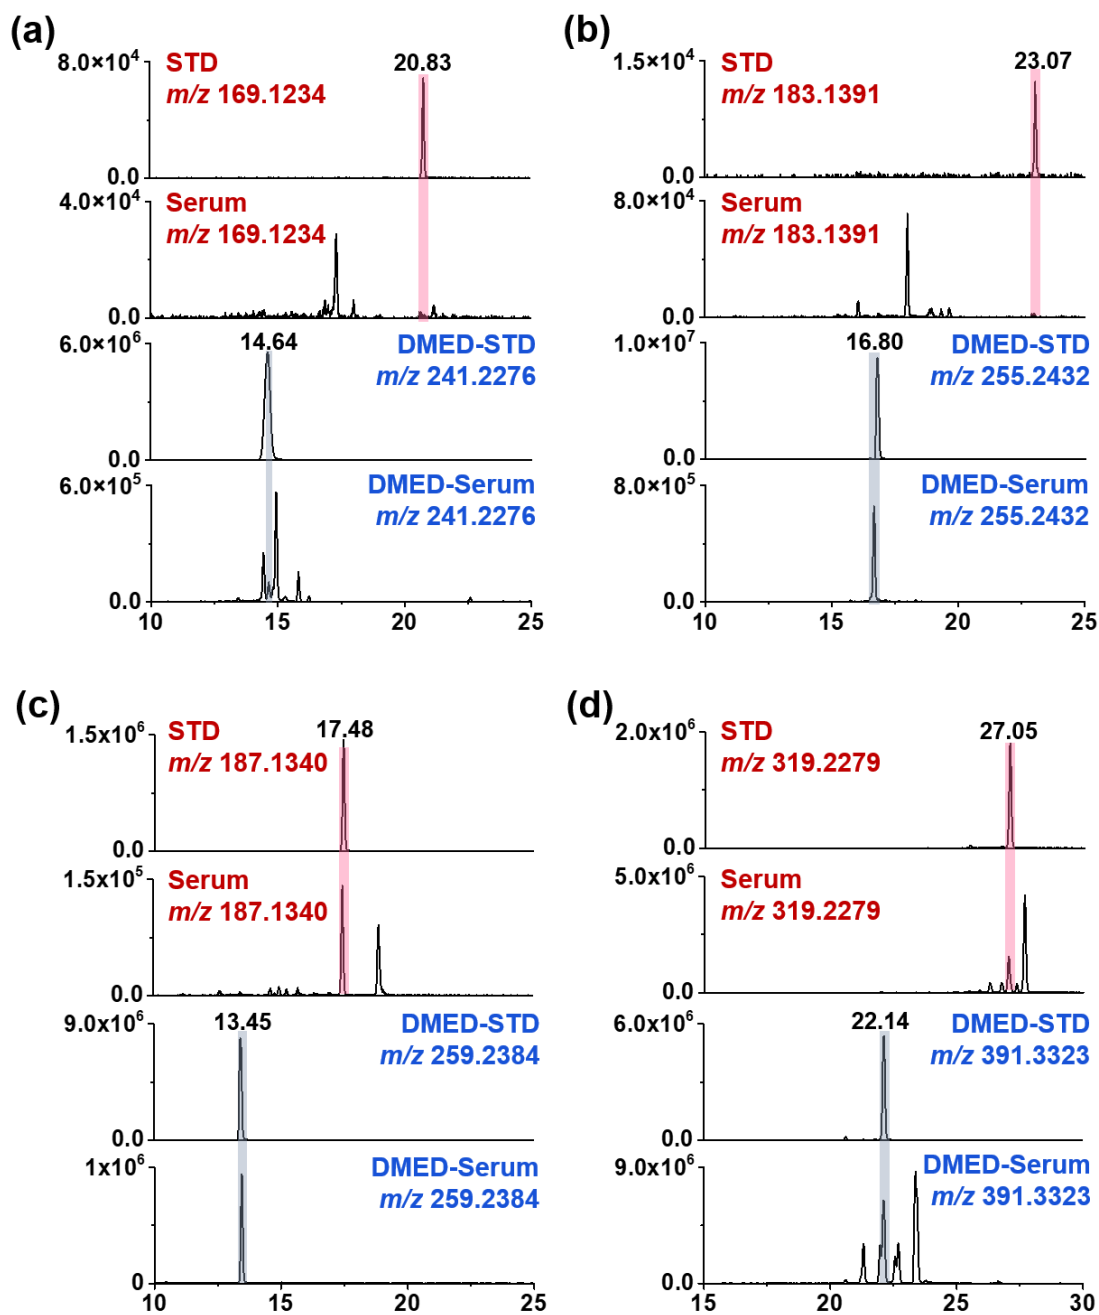

**Figure S1.** Comparison on the sensitivity of regular untargeted method and CIL-LC-MS method. Extracted ion chromatograms of unlabeled standard (STD), unlabeled serum (Serum), DMED labeled standard (DMED-STD) and DMED labeled standard (DMED-Serum) for (a) 9-decenoic acid; (b) undecylenic acid; (c) 3-hydroxydecanoic acid; (d) 12-HETE.



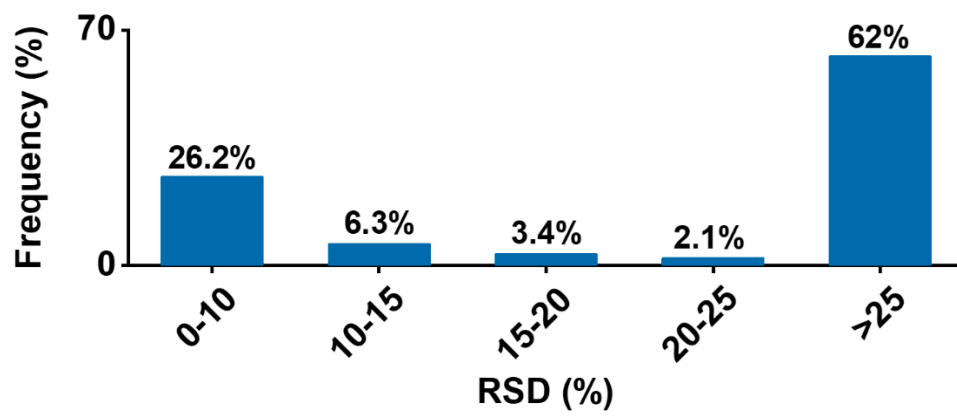

**Figure S2.** Frequency histogram of RSDs for metabolites in serum that detected by regular untargeted method.

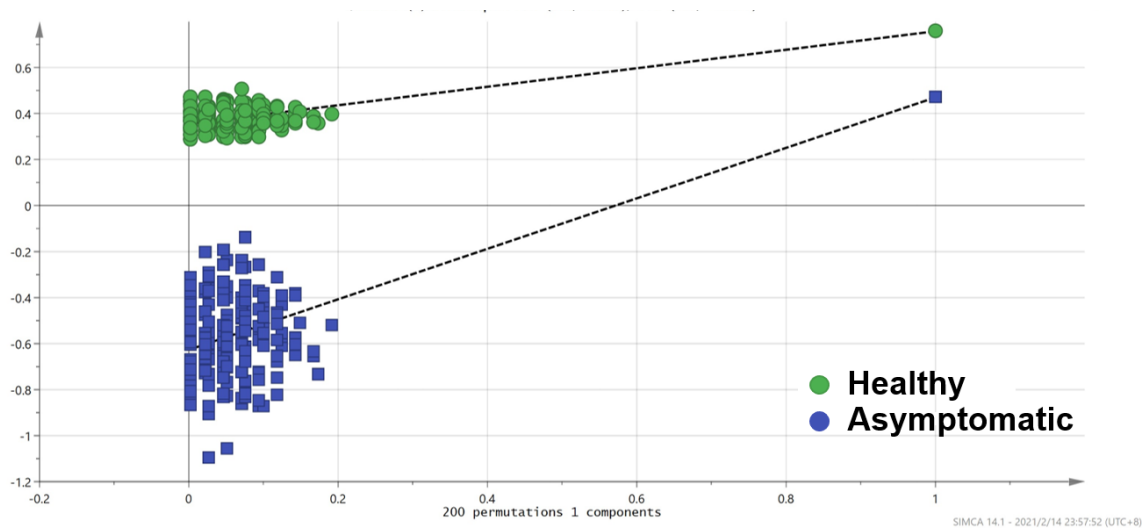

**Figure S3.** The validation plot for the OPLS-DA models.

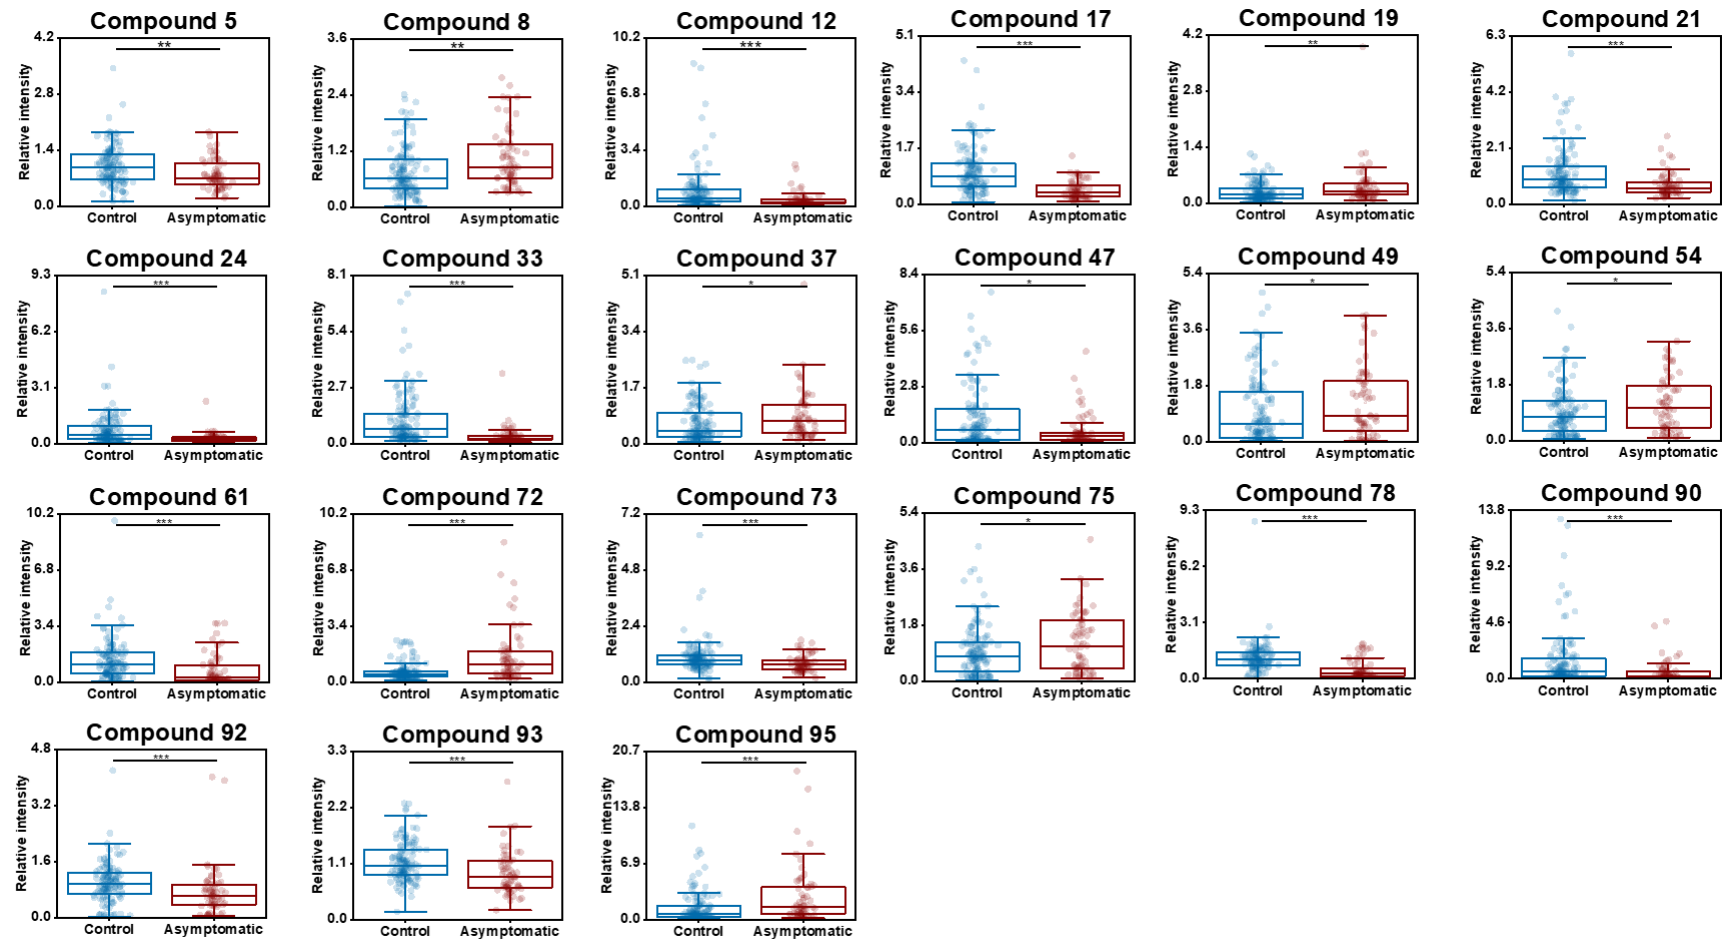

**Figure S4.** Boxplot of 21 discriminative features between healthy control and asymptomatic patient group.  $P$  value was calculated by Kruskal-Wallis test (\*,  $p < 0.05$ ; \*\*,  $p < 0.01$ ; \*\*\*,  $p < 0.001$ ).

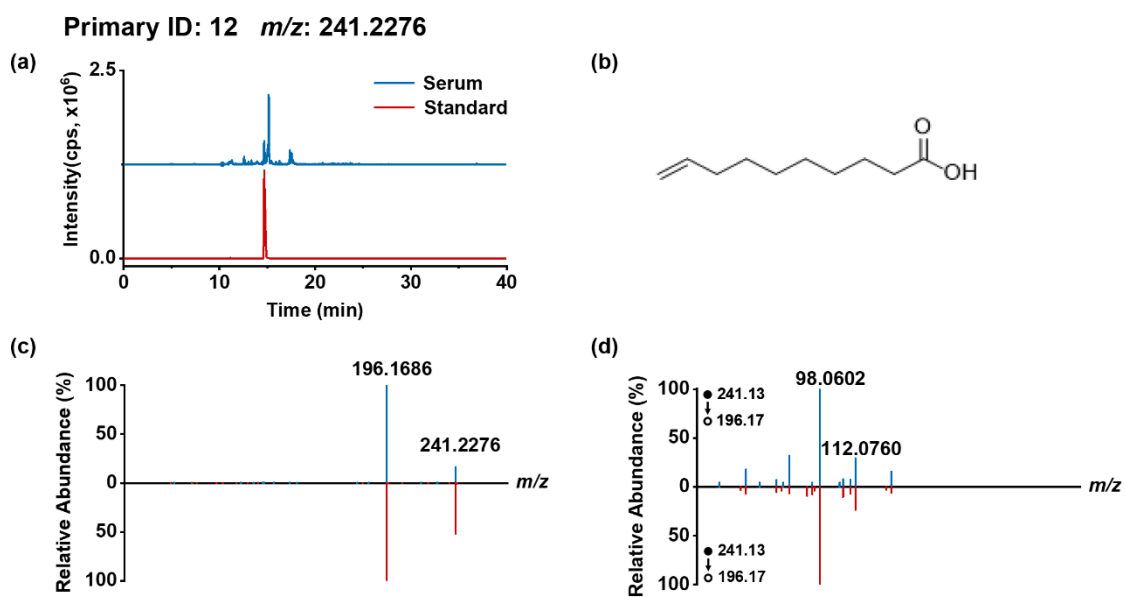

**Figure S5.** Chromatogram and  $MS^n$  spectra of 9-decenoic acid. (a) The XIC of 9-decenoic acid in serum sample and in standard solution; (b) The chemical structure of 9-decenoic acid; (c) The  $MS^2$  spectrum of 9-decenoic acid in serum sample and in standard solution; (d) The  $MS^3$  spectrum of fragment ion  $m/z$  196.17 (241.13-196.17) in serum sample and in standard solution.

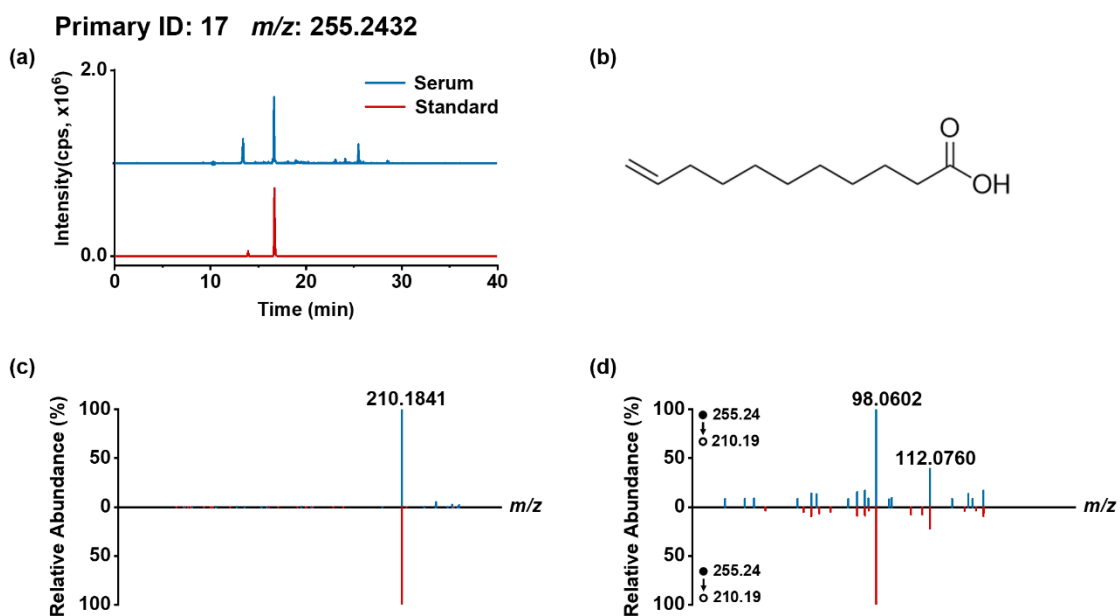

**Figure S6.** Chromatogram and  $MS^n$  spectra of undecylenic acid. (a) The XIC of undecylenic acid in serum sample and in standard solution; (b) The chemical structure of undecylenic acid; (c) The  $MS^2$  spectrum of undecylenic acid in serum sample and in standard solution; (d) The  $MS^3$  spectrum of fragment ion  $m/z$  210.19 (255.24-210.19) in serum sample and in standard solution.

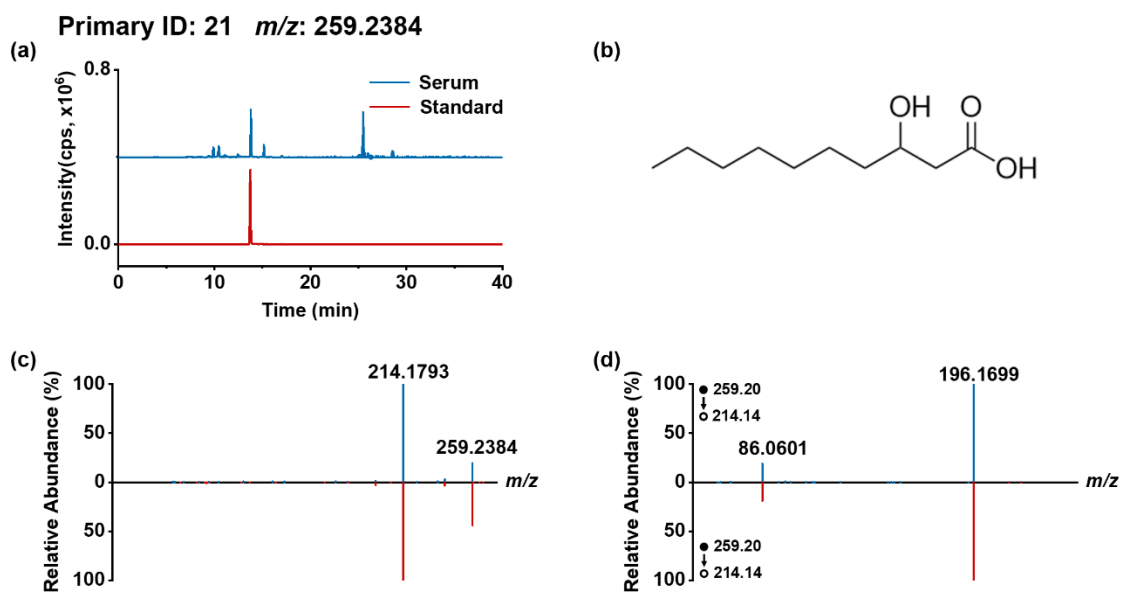

**Figure S7.** Chromatogram and MS<sup>n</sup> spectra of 3-hydroxydecanoic acid. (a) The XIC of 3-hydroxydecanoic acid in serum sample and in standard solution; (b) The chemical structure of 3-hydroxydecanoic acid; (c) The MS<sup>2</sup> spectrum of 3-hydroxydecanoic acid in serum sample and in standard solution; (d) The MS<sup>3</sup> spectrum of fragment ion  $m/z$  214.14 (259.20-214.14) in serum sample and in standard solution.

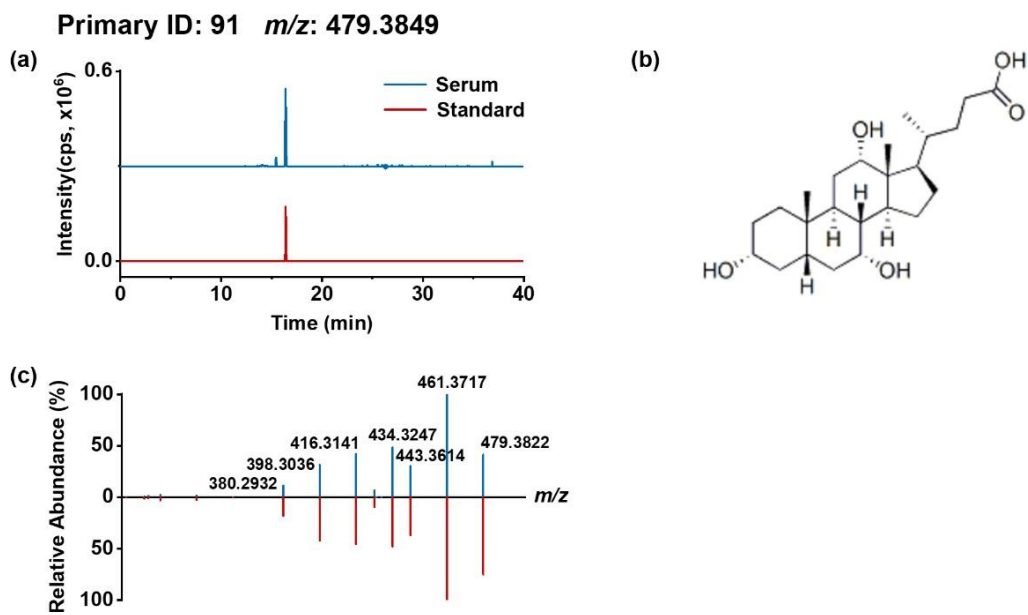

**Figure S8.** Chromatogram and MS<sup>n</sup> spectra of cholic acid. (a) The XIC of cholic acid in serum sample and in standard solution; (b) The chemical structure of cholic acid; (c) The MS<sup>2</sup> spectrum of cholic acid in serum sample and in standard solution.

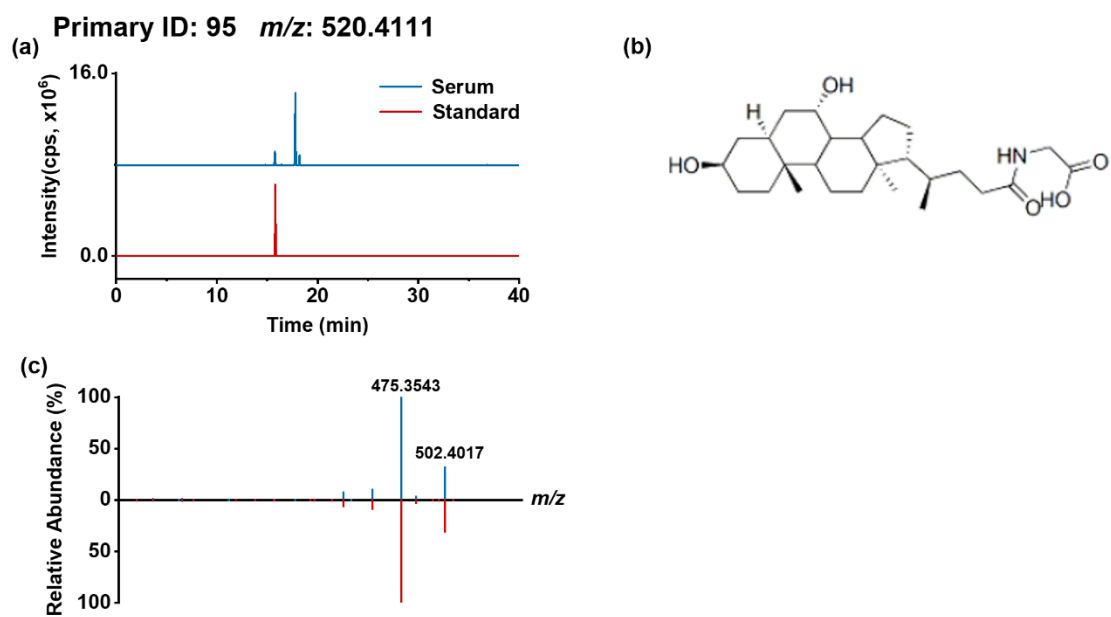

**Figure S9.** Chromatogram and MS<sup>n</sup> spectra of GUDCA. (a) The XIC of GUDCA in serum sample and in standard solution; (b) The chemical structure of GUDCA; (c) The MS<sup>2</sup> spectrum of GUDCA in serum sample and in standard solution.



Primary ID: 72  $m/z$ : 383.3272

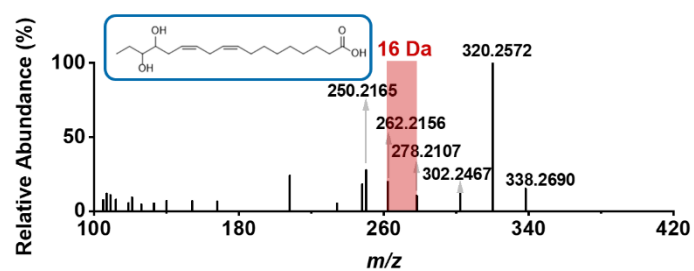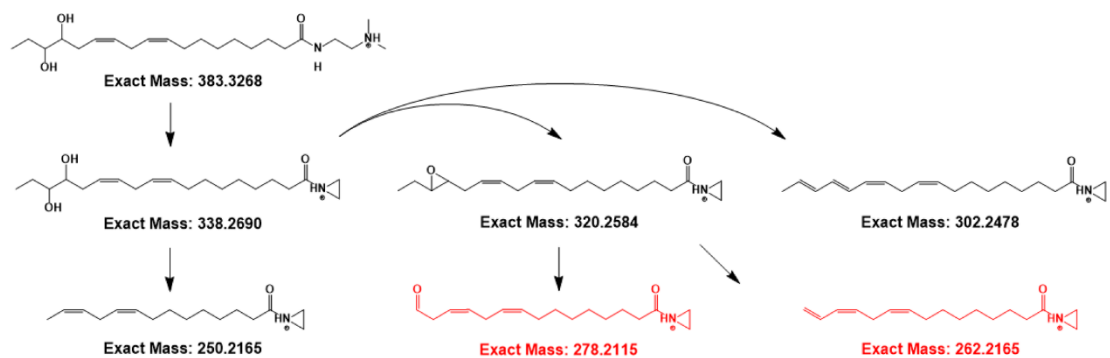

**Figure S10.** MS<sup>n</sup> spectra and fragmentation pattern of 15,16-DiHODE in serum. (a) The spectrum of  $m/z$  383.3268; (b) The possible fragmentation pathways.

Primary ID: 19  $m/z$ : 259.2017

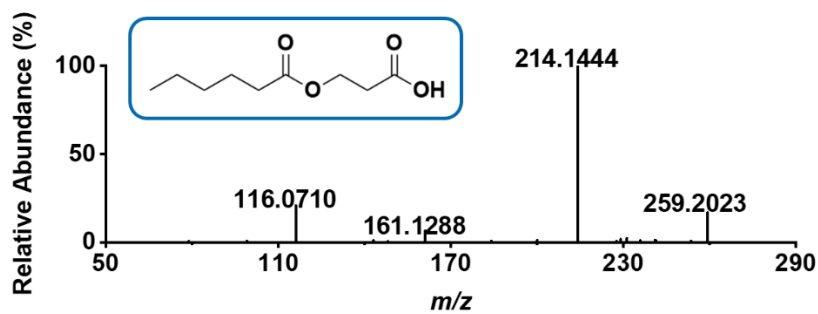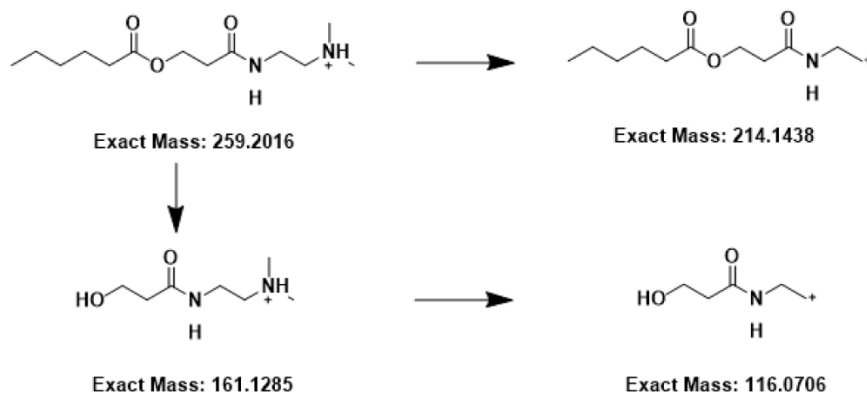

**Figure S11.** MS<sup>n</sup> spectra and fragmentation pattern of 3-(hexanoyloxy)propanoic acid in serum. (a) The MS<sup>2</sup> spectrum of  $m/z$  259.2017; (b) The possible fragmentation pathways.

Primary ID: 37  $m/z$ : 299.2330

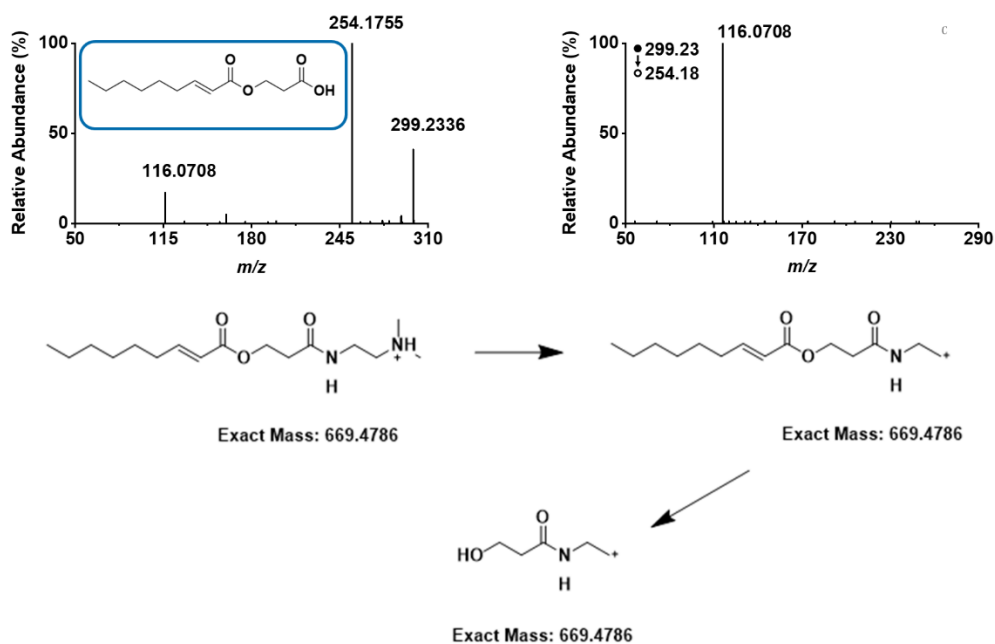

**Figure S12.** MS<sup>n</sup> spectra and fragmentation pattern of 3-(2-enoyloxy) propanoic acid in serum. (a) The MS<sup>2</sup> spectrum of  $m/z$  299.2330; (b) The MS<sup>3</sup> spectrum of fragment ion  $m/z$  254.18 (299.23-254.18); (c) The possible fragmentation pathways.
